# Supplementary material for: Multimodal Meta-Analysis of 1,494 Hepatocellular Carcinoma Samples Reveals Significant Impact of Consensus Driver Genes on Phenotypes
Source: Oxford University Press journal article supplement (doi:10.1158/1078-0432.ccr-18-0088), 2018-09-21
Supplement: 10780432ccr180088-sup-195255_3_supp_5009583_pf7rrr.docx [file 10780432ccr180088-sup-195255_3_supp_5009583_pf7rrr.docx]

**Multi-modal meta-analysis of 1494 hepatocellular carcinoma samples reveals significant impact of consensus driver genes on phenotypes**

Kumardeep Chaudhary1, Olivier B Poirion1,Liangqun Lu1,2, Sijia Huang1,2, Travers Ching1,2, Lana X Garmire1,2,3*

1Epidemiology Program, University of Hawaii Cancer Center, Honolulu, HI 96813, USA 2Molecular Biosciences and Bioengineering Graduate Program, University of Hawaii at Manoa, Honolulu, HI 96822, USA

3Current affiliation: Department of Computational Medicine and Bioinformatics, Building 520, 1600 Huron Parkway, Ann Arbor, MI 48109

Short Title: Impact of consensus driver genes in hepatocellular carcinoma

* To whom correspondence should be addressed.

Lana X. Garmire,

Department of Computational Medicine and Bioinformatics

Medical School, University of Michigan

Building 520, 1600 Huron Parkway

Ann Arbor-48109, MI, USA, Phone: +1-(734) 615-5510

Current email address: lgarmire@med.umich.edu

**Grant Support:** This research was supported by grants K01ES025434 awarded by NIEHS through funds provided by the trans-NIH Big Data to Knowledge (BD2K) initiative (http://datascience.nih.gov/bd2k), P20 COBRE GM103457 awarded by NIH/NIGMS, NICHD R01 HD084633 and NLM R01LM012373 and Hawaii Community Foundation Medical Research Grant 14ADVC-64566 to Lana X Garmire.

## **Supplementary File S1**

## **Associations between miR expression and consensus driver gene mutation/CNV**

We extended the linear modeling approach described earlier to examine the association between consensus driver genes and miR expression. As a result, we found 167 miRs significantly associated with the consensus drivers. Among them, 127 miRs are associated with driver gene CNV-level changes, 90 miRs are associated with the driver mutations, and 50 miRs are associated with both of them. The bipartite graphs of associations between miRs and driver gene mutations and CNVs, respectively (**Figures S5A and S5B)**. Overall, *CTNNB1* and *TP53* are most influential drivers, as expected, associated with 78 and 60 miRs respectively. From the mutation perspective, *CTNNB1* is dominantly associated with the most number (61) of miRs (**Figure S5A**), whereas from the driver gene CNV perspective, *TP53* is associated with the most number (51) of miRs (**Figure S5B**). From the miR-centric view, two miRs were associated with maximum number (3) of genes: *mir-374b* (*CTNNB1*, *RB1* and *RPS6KA3*) and *mir-548b* (*ALB*, *RB1*, *ARID1A*). The former has been shown to have a role in inhibition of liver cancer (1). On the other hand, *hsa-mir-181c* is associated with the most number (3) of genes (*CTNNB1*, *AXIN1* and *RB1*) at the mutation level. This miR is reported to reduce *SMAD7* expression at gene and protein level in neuroblastoma cells (2).

Since the miRs discovered above are based on linear models, they may directly or indirectly target the consensus drivers. To help narrow down the miRs that may directly target these drivers, we searched miRDB resource (3), in which miR and targets are predicted by correlational analysis of thousands of miRNA-target interactions from CLIP-Seq experiments. As results, we obtained 28 mature miRs (corresponding to our list of precursor miRs) that are predicted to target one or more consensus driver genes. *CTNNB1* is the predicted direct target of 8 miRs: *hsa-miR-214-3p*, *hsa-miR-330-3p*, *hsa-miR-4668-3p*, *hsa-miR-5586-3p, hsa-miR-150-5p*, *hsa-miR-885-5p*, *hsa-miR-3591-p* and *hsa-miR-6715b-5p*. Out of these, *hsa-miR-214* and *hsa-miR-885-5p* have been reported to be targeting *CTNNB1* based pathway(4,5). *hsa-miR-149-3p* is predicted to target *TP53* in our analysis, and interestingly latter has been shown to directly upregulate miR-149* in melanoma cells (6). *ARID1A* is the potential target of *hsa-miR-181b-3p*, *hsa-miR-1976*, *hsa-miR-92a-2-5p* and *hsa-miR-511-5p*. Future experimental studies are warranted to decipher if these miRs are indeed associated with driver genes at primary target level, or secondary, tertiary levels.

**References**

1. Huang F, Wang B, Zeng J, Sang S, Lei J, Lu Y. MicroRNA-374b inhibits liver cancer progression via down regulating programmed cell death-1 expression on cytokine-induced killer cells. Oncol Lett. Spandidos Publications; 2018;15:4797–804.

2. Li Y, Wang H, Li J, Yue W. MiR-181c modulates the proliferation, migration, and invasion of neuroblastoma cells by targeting Smad7. Acta Biochim Biophys Sin (Shanghai). Oxford University Press; 2014;46:48–55.

3. Wong N, Wang X. miRDB: an online resource for microRNA target prediction and functional annotations. Nucleic Acids Res. Oxford University Press; 2015;43:D146-52.

4. Xia H, Ooi LLPJ, Hui KM, Patel B, Majumdar A. MiR-214 Targets β-Catenin Pathway to Suppress Invasion, Stem-Like Traits and Recurrence of Human Hepatocellular Carcinoma. Gottardi C, editor. PLoS One. Public Library of Science; 2012;7:e44206.

5. Zhang Z, Yin J, Yang J, Shen W, Zhang C, Mou W, et al. miR-885-5p suppresses hepatocellular carcinoma metastasis and inhibits Wnt/β-catenin signaling pathway. Oncotarget. Impact Journals; 2016;7:75038–51.

6. Jin L, Hu WL, Jiang CC, Wang JX, Han CC, Chu P, et al. MicroRNA-149*, a p53-responsive microRNA, functions as an oncogenic regulator in human melanoma. Proc Natl Acad Sci U S A. 2011;108:15840–5.
